# Supplementary material for: Lysophosphatidic acid induces the migration and invasion of SGC-7901 gastric cancer cells through the LPA2 and Notch signaling pathways
Source: PubMed Central journal article supplement — Int J Mol Med. 2019 May 8;44(1):67–78. doi: 10.3892/ijmm.2019.4186 (PMC6559315; doi:10.3892/ijmm.2019.4186), 2019-05-08

Figure S1. Identification of the LPA2 mRNA levels in SGC-7901 cells. SGC-7901 and GES-1 cells were seeded in 6-well plates and the monolayer cells were collected when they reached 70-80% confluence. The mRNA levels of LPA1-LPA6 were determined by reverse transcription-quantitative polymerase chain reaction. These results are representative of three independent experiments. \* $P < 0.05$  with comparisons shown by lines. LPA, lysophosphatidic acid.

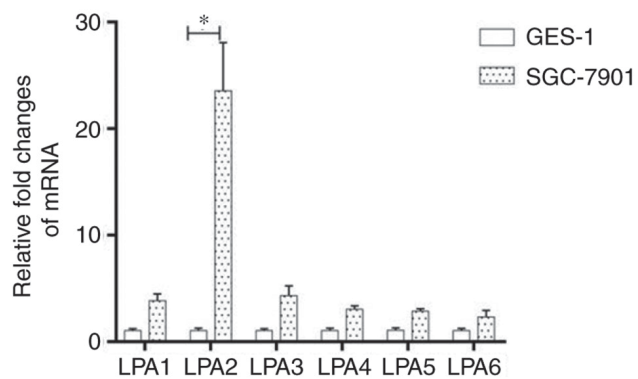

Figure S2. Effects of LPA2 and Notch1 knockdown on migration and invasion by LPA treatment in SGC-7901 cells. The double molecules knockdown was performed by transfection with 125 nM LPA2 and Notch1 siRNA for 24 h. Transfected cells were then treated with or without 15  $\mu$ M LPA for 24 h, then (A) Transwell migration and (B) invasion assays were performed. These results are representative of three independent experiments. \*\*P<0.01 with comparisons shown by lines. LPA, lysophosphatidic acid; si-, small interfering RNA; NC, negative control; FBS, foetal bovine serum.

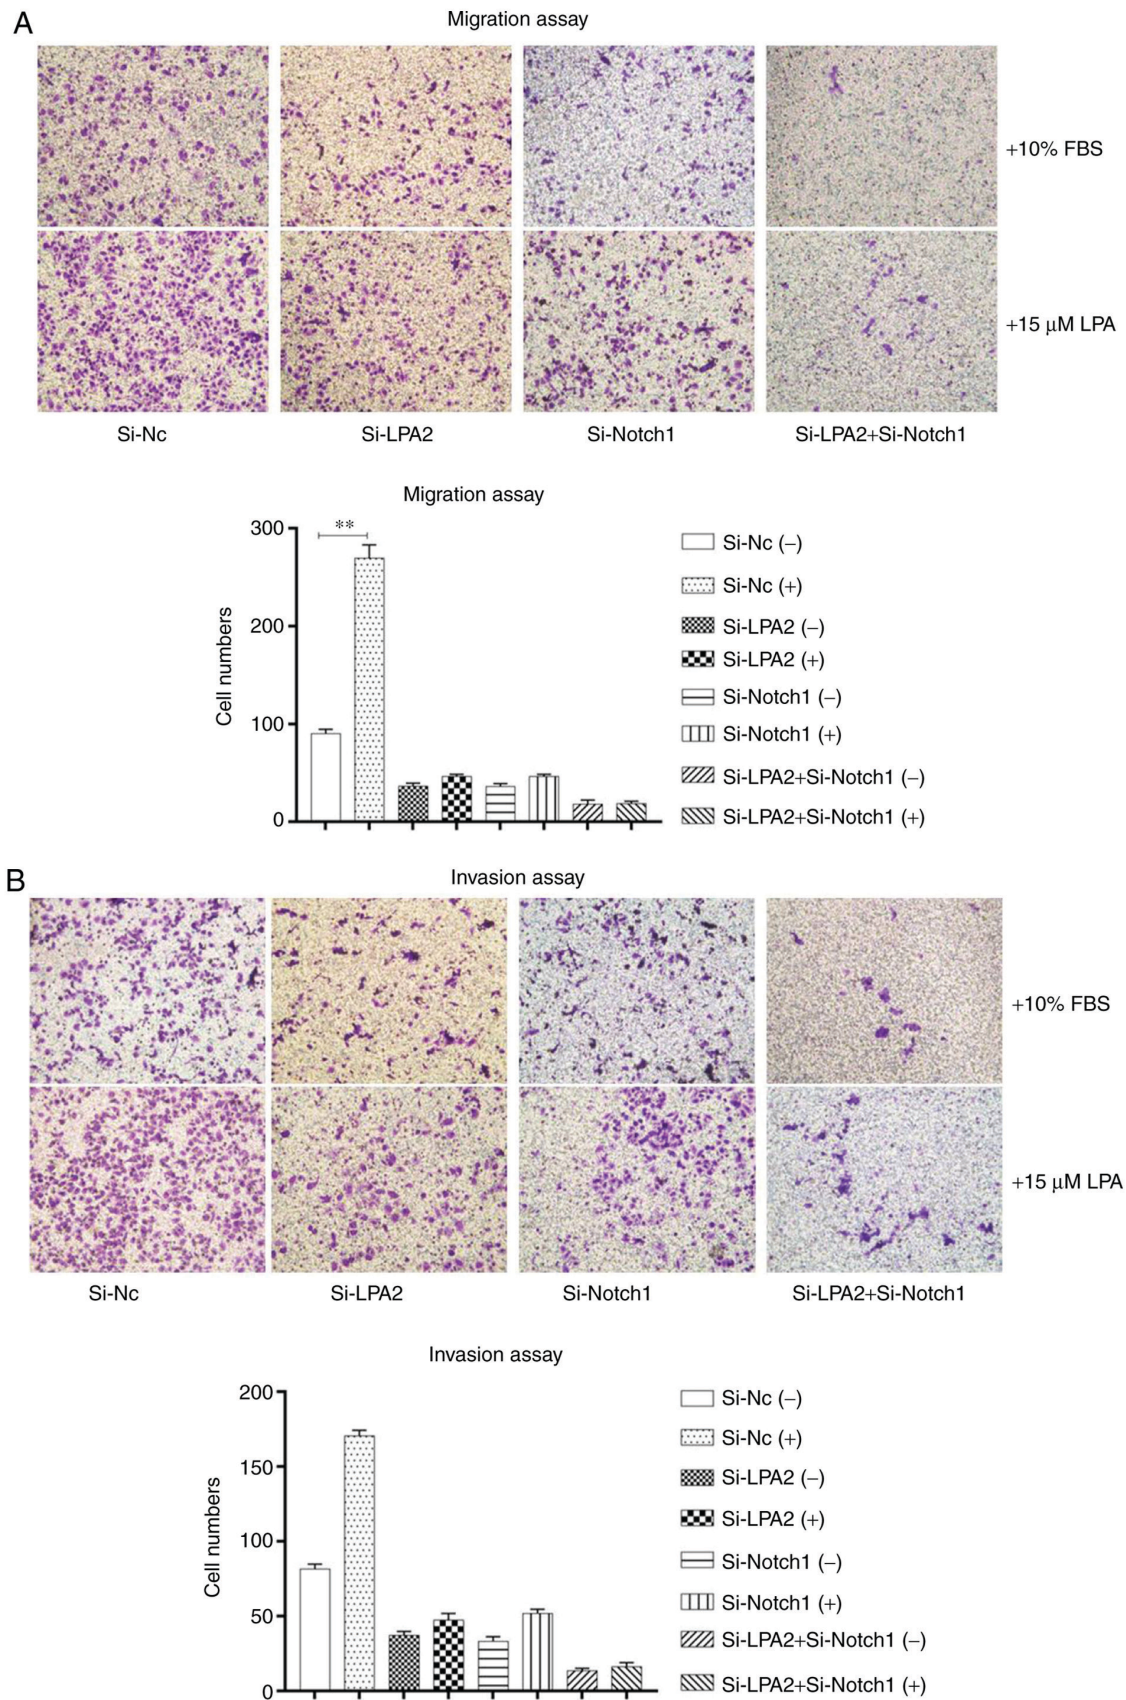

Supplement: Supplementary_Data.pdf [file Supplementary_Data.pdf]
